# Supplementary material for: Effects of Insect Consumption on Human Health: A Systematic Review of Human Studies
Source: MDPI journal article supplement (doi:10.3390/nu15143076), 2023-07-08
Supplement: s1 [file s1]

**Table S1.** Risk of bias assessment

| Domains                                 | Randomization process <sup>1</sup>                         | Deviations from intended intervention <sup>2</sup>                      | Carryover effects <sup>3</sup>                                  | Missing outcome data <sup>4</sup>                                                             | Measurement of outcome <sup>5</sup>                                                                                               | Overall risk of bias                             |
|-----------------------------------------|------------------------------------------------------------|-------------------------------------------------------------------------|-----------------------------------------------------------------|-----------------------------------------------------------------------------------------------|-----------------------------------------------------------------------------------------------------------------------------------|--------------------------------------------------|
| Signaling questions                     | Concealed allocation sequence / Random allocation sequence | Blinded to participants / Blinded to investigators / compliance check / | Washout time appropriate for disappearance of carryover effects | Flow of participants described / outcome data for all participants that finished the protocol | Appropriate method to measure outcome / potential influence by knowledge of intervention or mismatch of test and control products | Low risk of bias/Some concerns/High risk of bias |
| Mwangi et al., 2022 (Netherlands) [31]  | NI/Y<br>Concerns                                           | Y/N/Y<br>Concerns                                                       | PY<br>Low risk                                                  | Y/Y<br>Low risk                                                                               | Y/PN<br>Low risk                                                                                                                  | High risk                                        |
| Hermans et al., 2021 (Netherlands) [28] | PY/Y<br>Low risk                                           | Y/Y/Y<br>Low risk                                                       | NA                                                              | Y/Y<br>Low risk                                                                               | Y/N<br>Low risk                                                                                                                   | Low risk                                         |
| Vangsoe et al. 2018a (Denmark) [25]     | NI/NI<br>High risk                                         | Y/NI/PY<br>Concerns                                                     | PY<br>Low risk                                                  | Y/Y<br>Low risk                                                                               | Y/PN<br>Low risk                                                                                                                  | High risk                                        |
| Vangsoe et al. 2018b (Denmark) [26]     | NI/NI<br>High risk                                         | Y/N/Y<br>Concerns                                                       | NA                                                              | Y/Y<br>Low risk                                                                               | Y/PY<br>Concerns                                                                                                                  | High risk                                        |
| Dai et al., 2022 (Canada) [29]          | Y/Y<br>Low risk                                            | Y/Y/Y<br>Low risk                                                       | PY<br>Low risk                                                  | Y/Y<br>Low risk                                                                               | Y/N (except for one outcome that was participant-assessed)<br>Low risk                                                            | Low risk                                         |
| Miguéns-Gómez et al., 2022 (Spain) [30] | NI/NI<br>High risk                                         | Y/N/Y<br>Concerns                                                       | PY<br>Low risk                                                  | N/NI<br>High risk                                                                             | Y/PY<br>Concerns                                                                                                                  | High risk                                        |
| Skotnicka et al., 2022 (Poland) [32]    | NI/NI<br>High risk                                         | Y/Y/NI<br>Concerns                                                      | PY<br>Low risk                                                  | N/Y<br>Concerns                                                                               | Y/PY<br>Concerns                                                                                                                  | High risk                                        |
| Stull, et al., 2018 (USA) [24]          | Y/NI<br>Low risk                                           | Y/Y/Y<br>Low risk                                                       | PY<br>Low risk                                                  | Y/Y<br>Low risk                                                                               | Y/PY<br>Concerns                                                                                                                  | Some concerns                                    |
| Hu, et al., 2020 (China) [27]           | NI/NI<br>High risk                                         | N/N/Y<br>Concerns                                                       | NA                                                              | Y/Y<br>Low risk                                                                               | Y/PY<br>Concerns                                                                                                                  | High risk                                        |

Answers to signaling questions: Y = yes; PY = probably yes; N = no; PN = probably no; NI = no sufficient information; NA = not applied.

1 Assessment of risk of bias from randomization process - low risk: Y or PY for both questions OR Y or PY to allocation concealment AND NI on random allocation sequence as long as there is no imbalance on the baseline of both intervention groups; concerns: NI for sequence allocation concealment, irrespective of

random allocation sequence, or Y/PY for sequence allocation concealment AND N or PN for random allocation sequence; high risk: N or PN for sequence allocation concealment irrespective of random allocation sequence OR NI for both questions.

2 Assessment of risk of bias due to deviations from intended intervention - low risk: Y or PY for all signaling questions; concerns: at least one N or PN or NI; high risk: N or PN or NI for all signaling questions.

3 Assessment of risk of bias due to carryover effects in crossover interventions - low risk: Y or PY; concerns: NI; high risk: N or PN.

4 Assessment of risk of bias due to missing outcome data - low risk: Y or PY for all signaling questions; concerns: one Y or PY, AND one NI or N or PN; high risk N or PN or NI for all signaling questions.

5 Assessment of risk of bias due to outcome assessment - low risk: Y or PY for appropriate method of measurement AND N or PN for potential influence; concerns: Y or PY for appropriate method of measurement AND NI or Y or PY for potential (for participant-reported outcomes, the assessment of outcome is always considered as potentially influenced by knowledge of intervention, independently of blinding); high risk: NI or N or PN for appropriate method of measurement, irrespective of the other signaling question.

Overall evaluation: Low risk of bias, when all assessed domains are low risk; Some concerns, if any domain was assessed as some concerns AND no domain was assessed as high risk; High risk of bias, when at least one domain was assessed as high risk, or multiple domains were assessed as some concerns [24].
